# Supplementary material for: Oral administration of egg ovalbumin allergen induces dysregulation of tryptophan metabolism in sensitized BALB/c mice
Source: Royal Society of Chemistry journal article supplement (doi:10.1039/d3fo05300h), 2024-01-01
Supplement: d3fo05300h1.pdf [file d3fo05300h1.pdf]

## Supporting Information

### Oral administration of egg ovalbumin allergen induces dysregulation of tryptophan metabolism in sensitized Balb/c mice

Zhongliang Wang<sup>1,2,4</sup>, Jie Zhang<sup>1,2,5</sup>, Jin Yuan<sup>1,2,4</sup>, Fangfang Min<sup>1,2,4</sup>, Jinyan Gao<sup>2,4</sup>, Wenfeng Liu<sup>1,2,4</sup>, Meijia Huang<sup>1,2,4</sup>, Yong Wu<sup>1,3,4\*</sup>, Hongbing Chen<sup>1,3,4\*</sup>

1 State Key Laboratory of Food Science and Resources, Nanchang University, Nanchang 330047, China

2 College of Food Science and Technology, Nanchang University, Nanchang 330031, China

3 Sino German Joint Research Institute, Nanchang University, Nanchang 330047, China

4 Jiangxi Province Key Laboratory of Food Allergy, Nanchang University, Nanchang 330047, China

5 Animal Science and Technology Center, Jiangxi University of Traditional Medicine, Nanchang 330004, China

-----  
\*Corresponding author. State Key Laboratory of Food Science and Resources, Nanchang University, Nanchang 330047, China; Jiangxi Province Key Laboratory of Food Allergy, Nanchang University, Nanchang 330047, Jiangxi, China; Sino-German Joint Research Institute, Nanchang University, Nanchang 330047, Jiangxi, China.

E-mail address: [chenhongbing@ncu.edu.cn](mailto:chenhongbing@ncu.edu.cn) (H.B. Chen); [wuyong@ncu.edu.cn](mailto:wuyong@ncu.edu.cn) (Y. Wu)

**Table S1 Fecal Scoring Criteria**

---

| Score | criteria       |
|-------|----------------|
| 0     | solid-state    |
| 1     | funicular form |
| 2     | slurry         |
| 3     | watery state   |

---

Table S2. List of primers used in this study

| Primer Target    |                | Primer sequence              |
|------------------|----------------|------------------------------|
| <i>ZO-1</i>      | <b>Forward</b> | CGAGGCATCATCCCAAATAAGAA<br>C |
|                  | <b>Reverse</b> | TCCAGAAGTCTGCCCCGATCAC       |
| <i>Ocludin-1</i> | <b>Forward</b> | ACGGTCTTTGCACTTTGGTC         |
|                  | <b>Reverse</b> | GGGAGAGGAGAAGCACAGTT         |
| <i>Occludin</i>  | <b>Forward</b> | TTGAAAGTCCACCTCCTTACAGA      |
|                  | <b>Reverse</b> | CCGGATAAAAAGAGTACGCTGG       |
| <i>Reg3g</i>     | <b>Forward</b> | CAAGGTGAAGTTGCCAAGAA         |
|                  | <b>Reverse</b> | CCTCTGTTGGGTTTCATAGCC        |
| <i>AHR</i>       | <b>Forward</b> | CGCTGCTTCCTCCACAACCTG        |
|                  | <b>Reverse</b> | TAAGCTGCCCTTTGGCATCAC        |
| <i>GAPDH</i>     | <b>Forward</b> | CCTGTTGCTGTAGCCGTATTCA       |
|                  | <b>Reverse</b> | CCAGGTTGTCTCCTGCGACTT        |

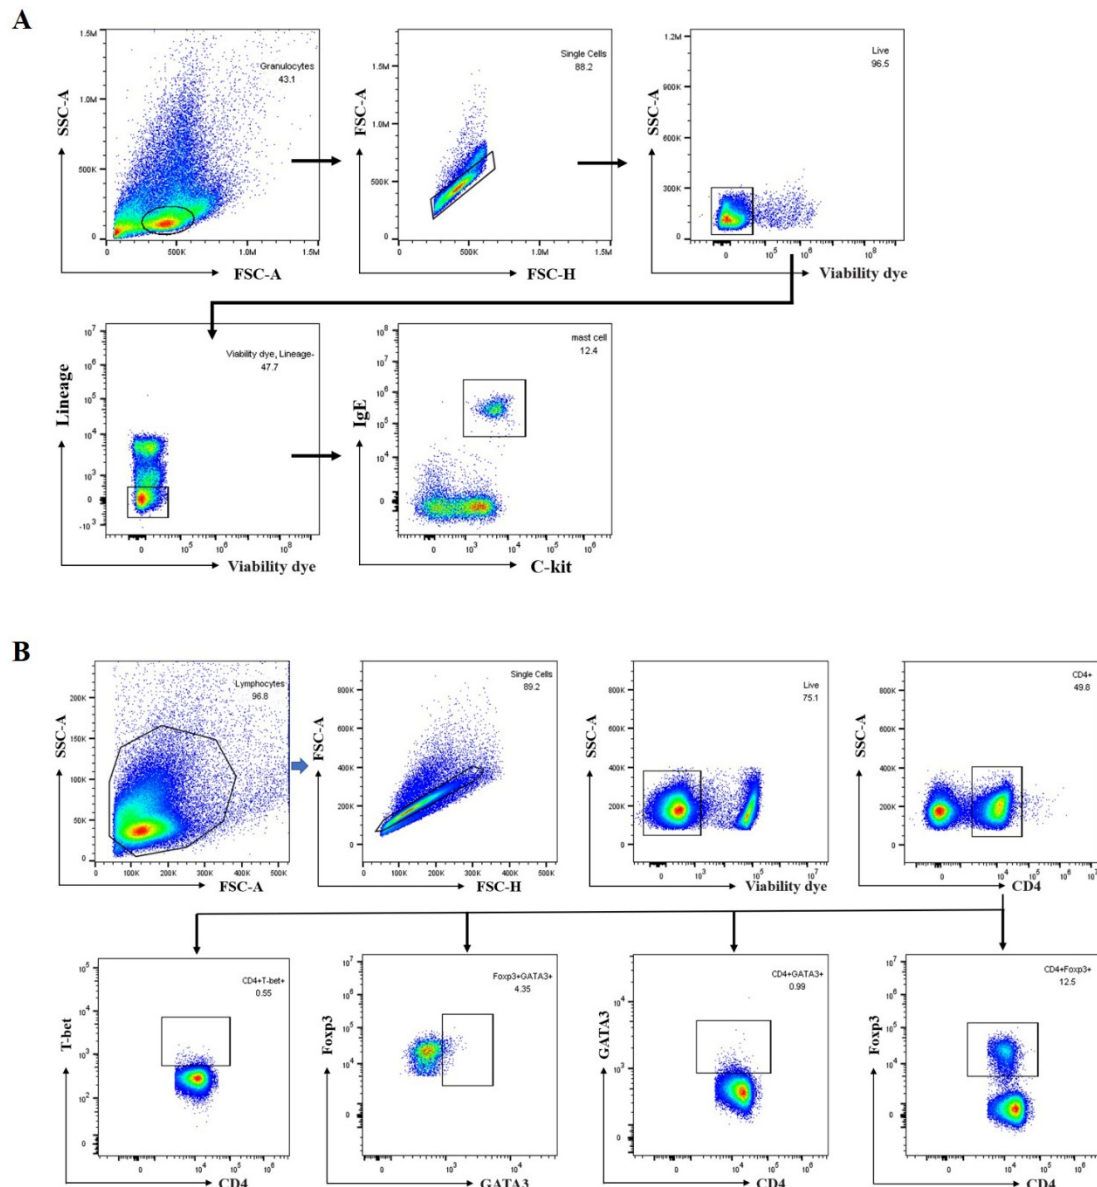

Figure S1 Gating strategy for flow cytometric analysis.

(A) Gating strategy of mast cells in small intestinal lamina propria. (B) Gating strategy of T helper cells in MLNs.

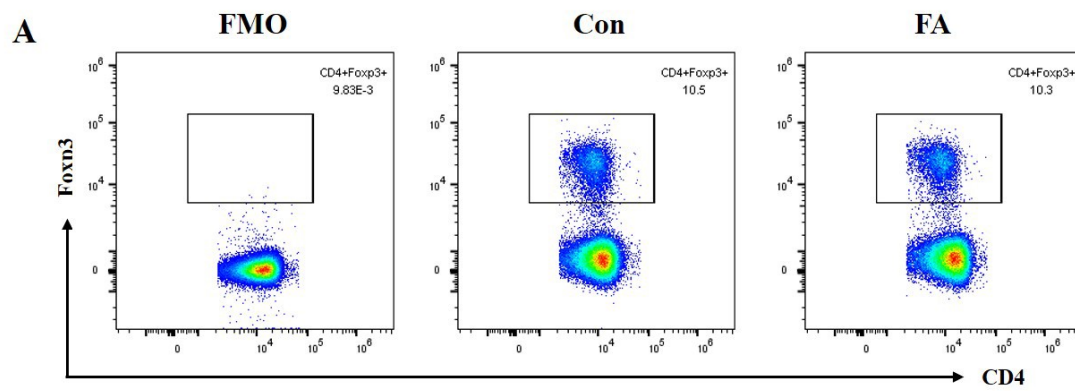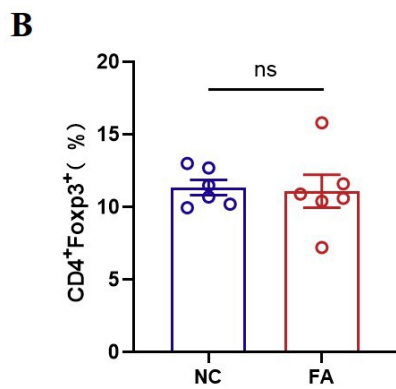

Figure S2 (A) Flow cytometric analysis and (B) frequencies of CD4<sup>+</sup>Foxp3<sup>+</sup> T cells in the MLNs.

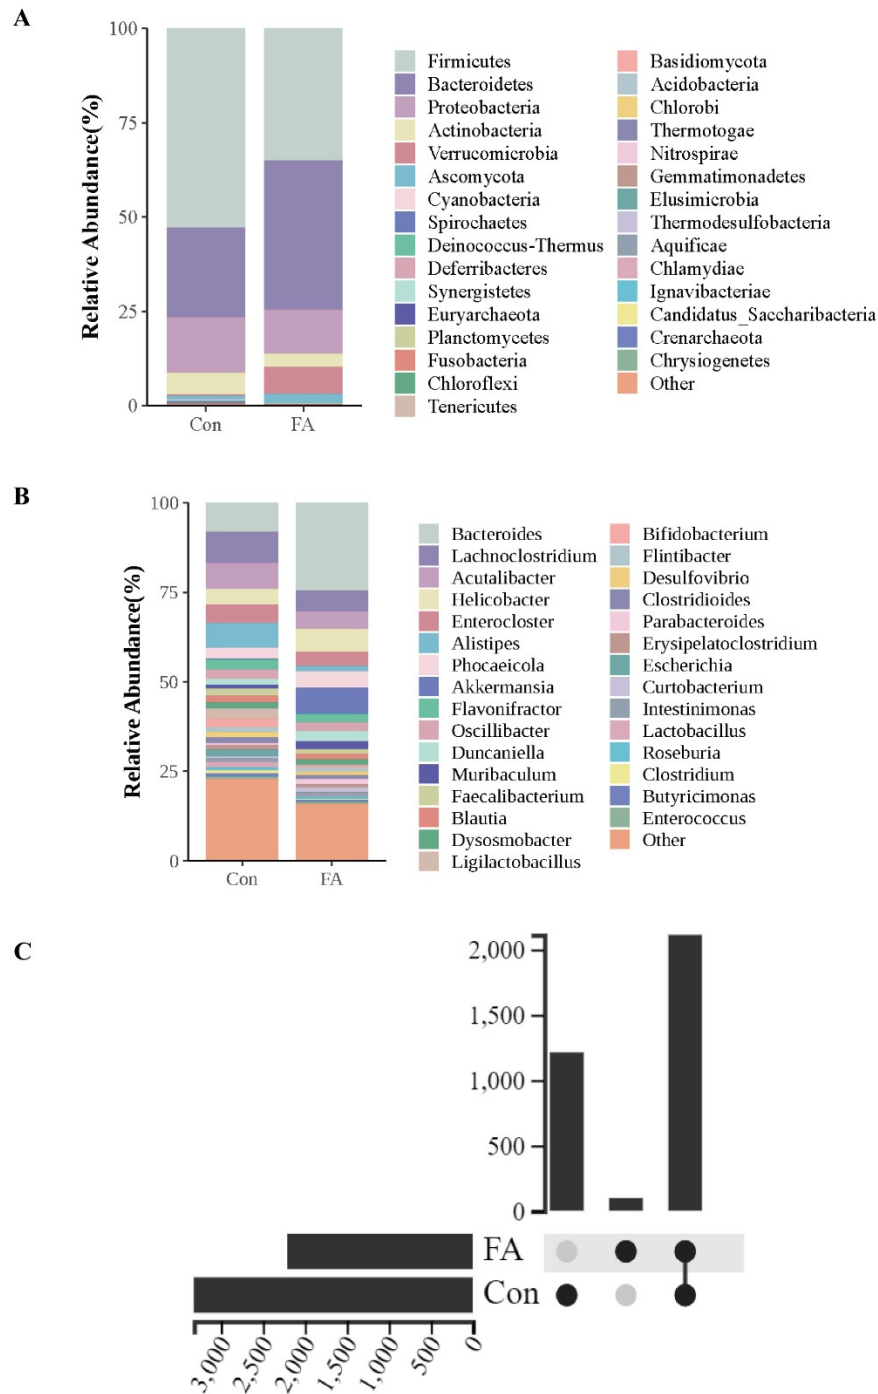

Figure S3 Oral OVA challenge induces the imbalance of gut microbiota  
 (A) Gut bacterial composition at phylum level in the FA and Con groups.  
 (B) Gut bacterial composition at genus level in the FA and Con groups. (C)  
 Statistical data on unique and shared strains in the FA and Con groups

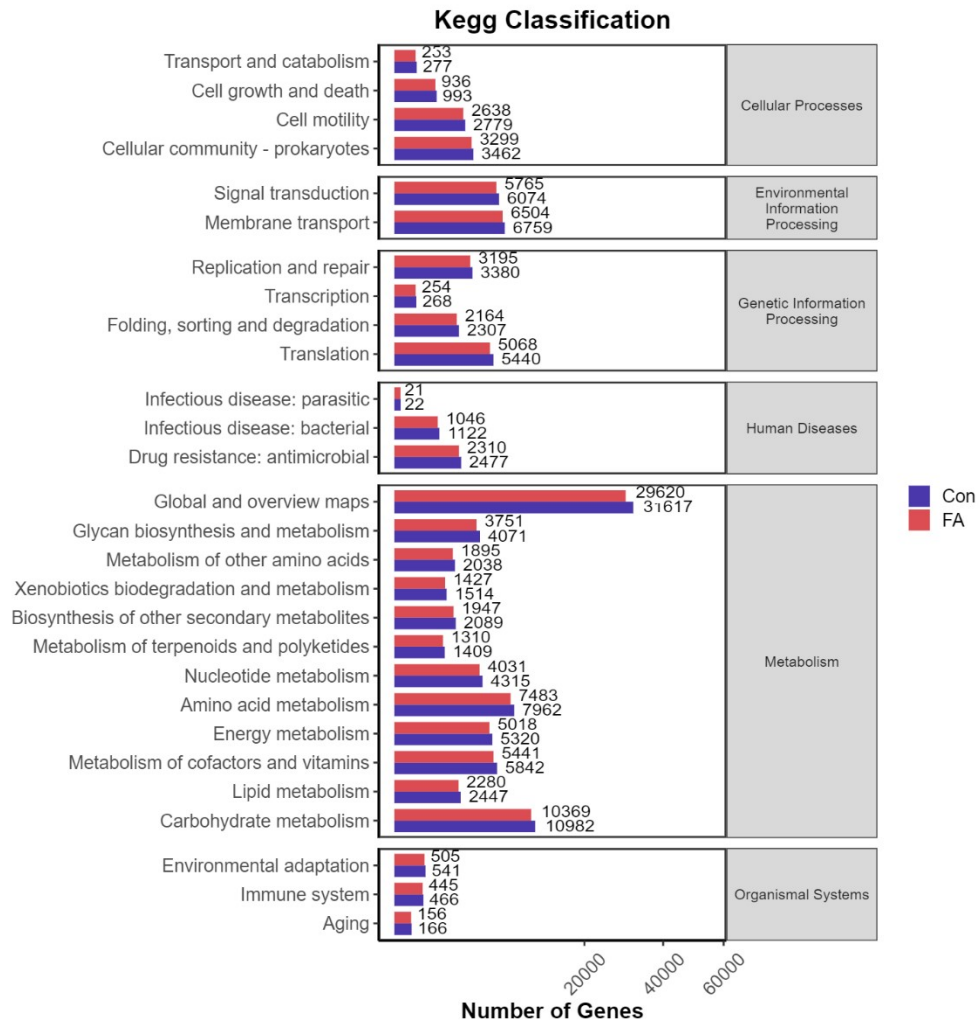

Figure S4 The mapping of bacterial gene catalogues in the KEGG database.

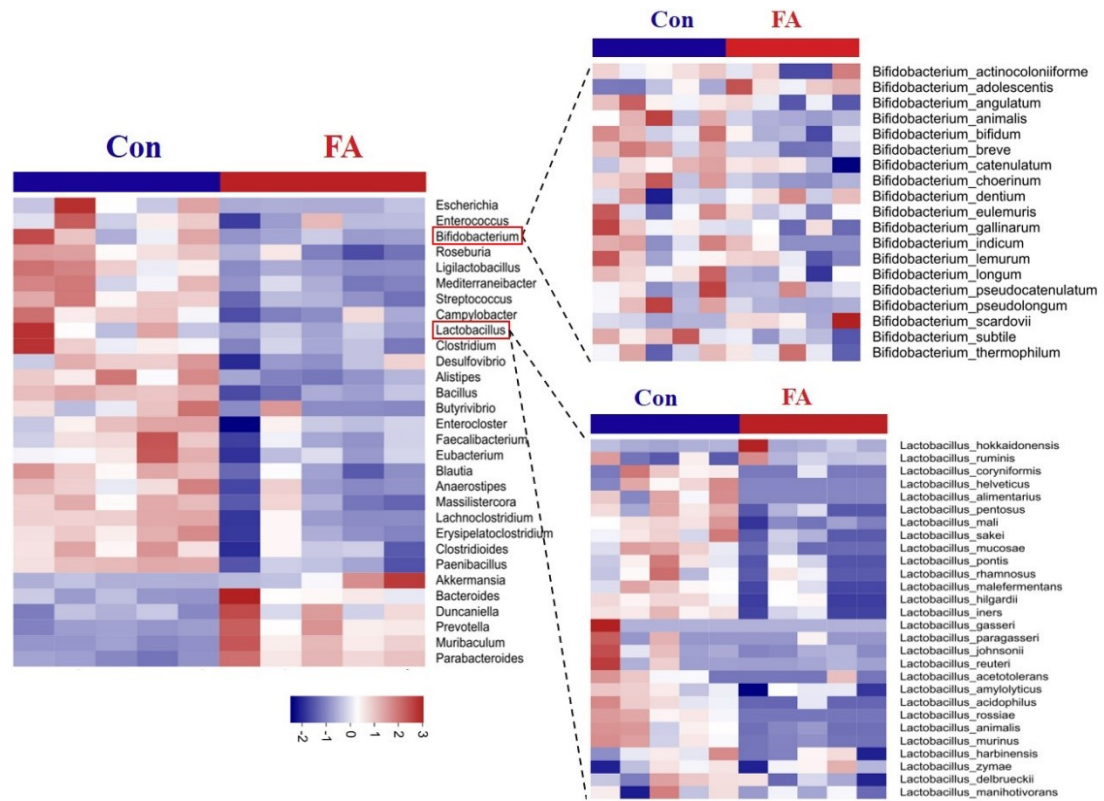

Figure S5 The abundance of Lactobacillus and Bifidobacterium in the FA and Con groups
